# Supplementary material for: Magnetic field driven assembly of 1D-aligned silver superstructures
Source: Royal Society of Chemistry journal article supplement (doi:10.1039/c1ce05367a), 2011-01-01
Supplement: c1ce05367a.pdf [file c1ce05367a.pdf]

## Electronic Supplementary Information

# Magnetic field driven assembly of 1D-aligned silver superstructures

Shaodong Sun, Dongchu Deng, Chuncai Kong, Yunxia Zhang, Xiaoping Song, Bingjun Ding, and Zhimao Yang\*

*School of Science, MOE Key Laboratory for Non-Equilibrium Synthesis and Modulation of Condensed Matter,*

*State Key Laboratory for Mechanical Behavior of Materials, Xi'an Jiaotong University, Xi'an 710049, ShaanXi,*

*People's Republic of China*

\* Corresponding author. E-mail: zmyang@mail.xjtu.edu.cn

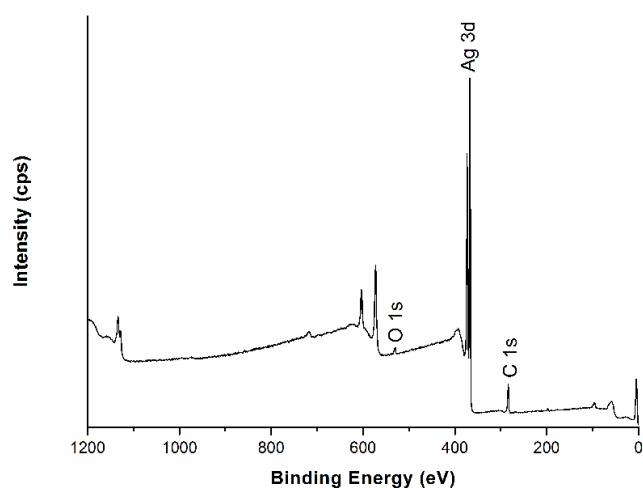

**Fig. S1** XPS wide spectrum of 1D-aligned as-prepared products.

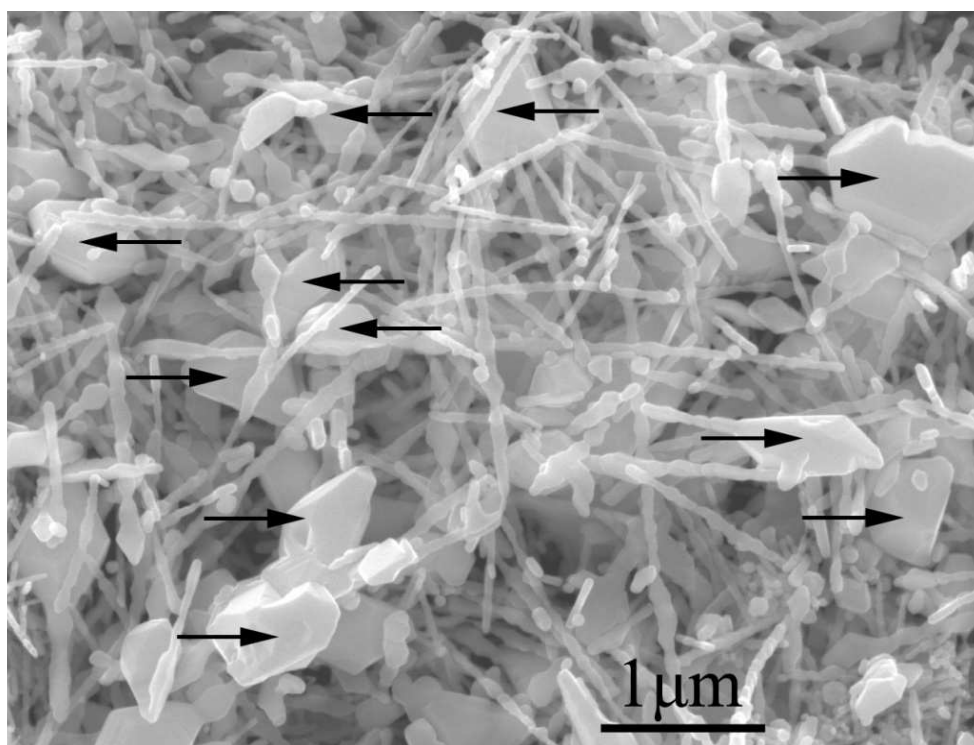

**Fig. S2** The FESEM image of the products obtained under a relatively higher potential (30 V).
